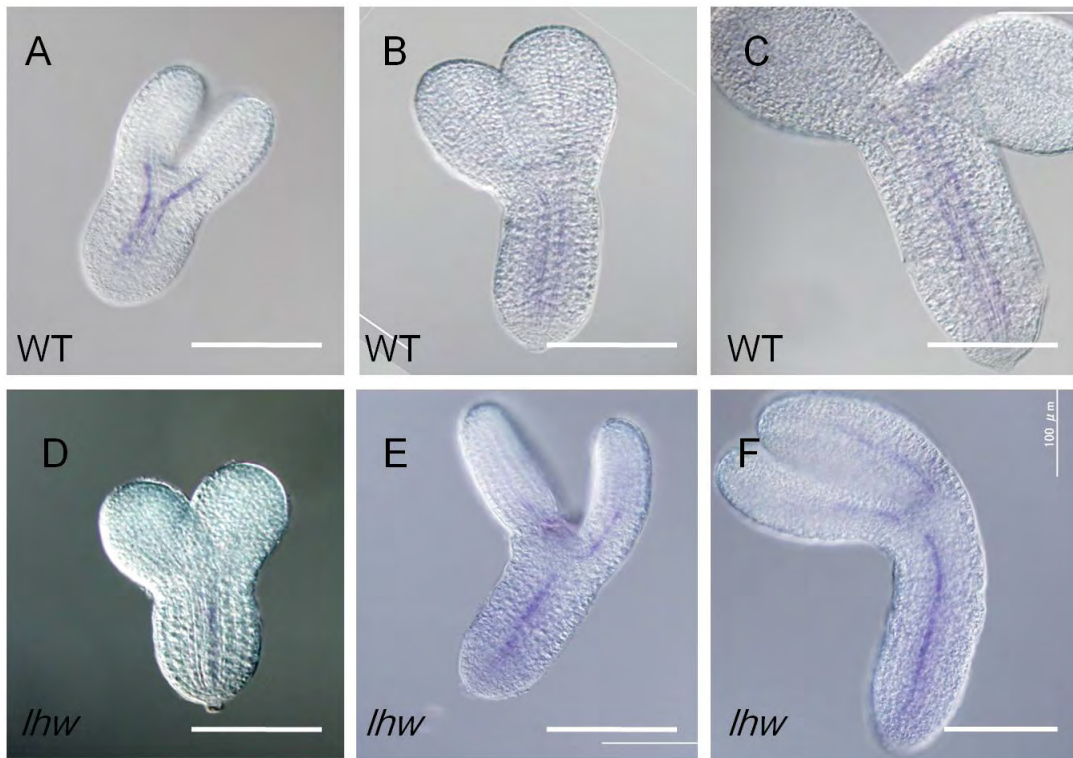

**Fig. S1. Accumulation of *TMO5-LIKE1* transcripts during embryogenesis of *Arabidopsis*.** (A-F) Accumulation of *TMO5-LIKE1* transcripts in wild-type embryos (A-C) and *lhw* mutant embryos (D-F). Scale bars: 50 μm.

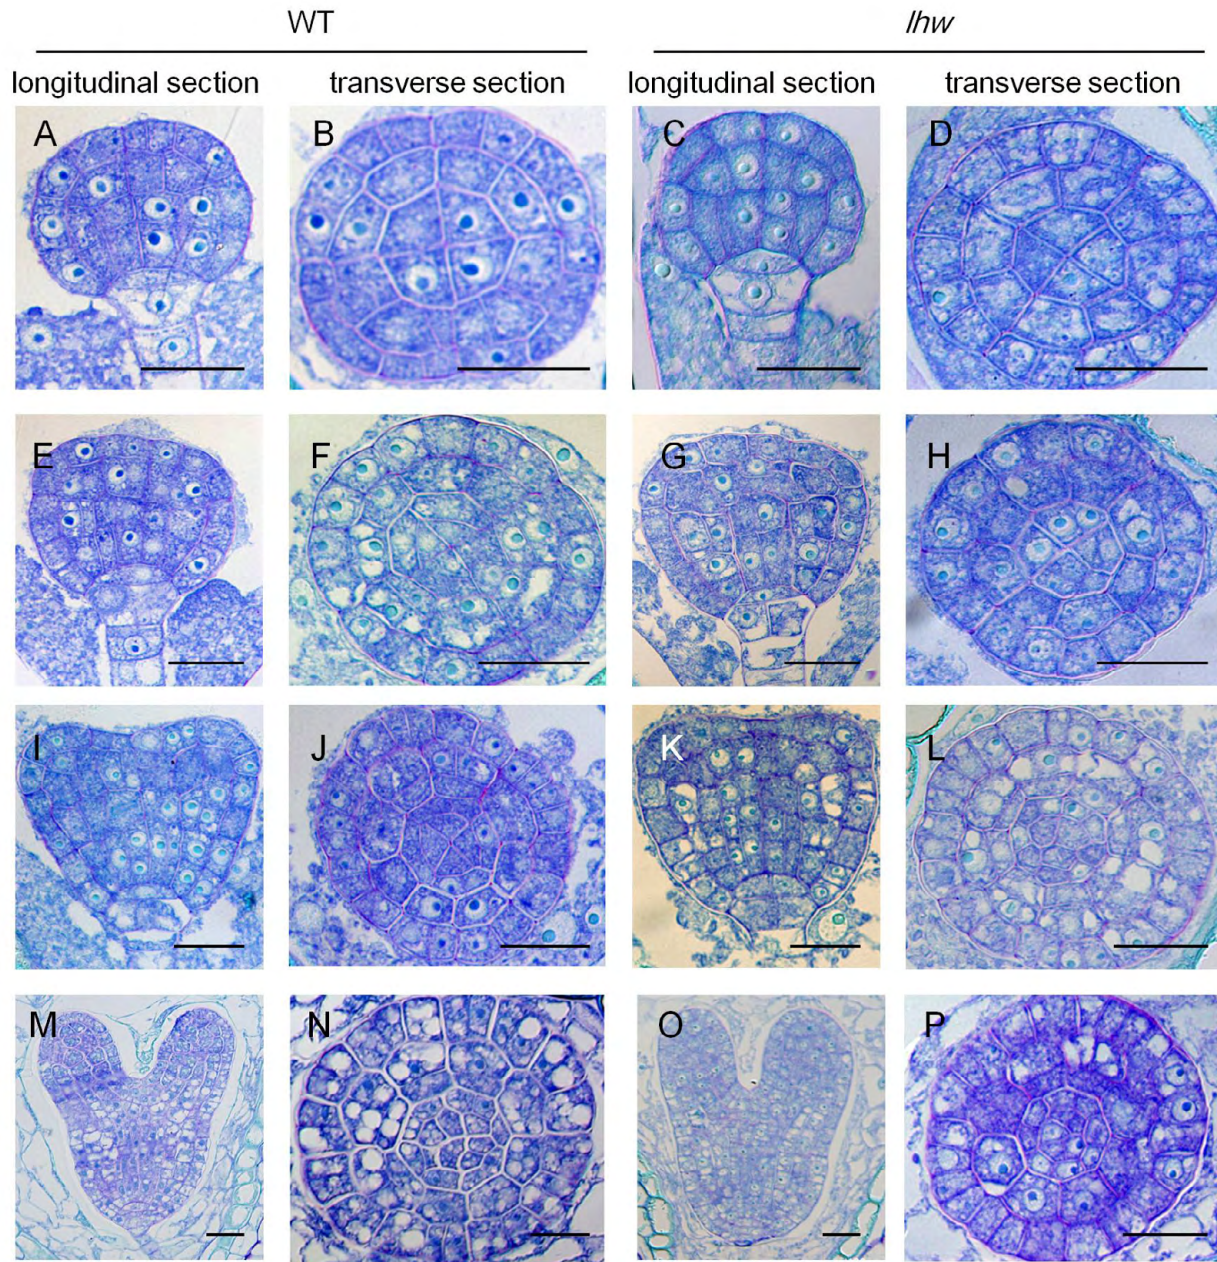

**Fig. S2. Anatomical analysis of wild-type and *lhw* embryos.** (A-D) Globular-stage embryos of wild type (A,B) and *lhw* (C,D). (E-H) Transition stage embryos of wild-type (E,F) and *lhw* (G,H). (I-L) Early heart stage embryos of wild type (I,J) and *lhw* (K,L). (M-P) Late heart stage embryos of wild type (M,N) and *lhw* (O,P). Scale bars: 20  $\mu$ m.

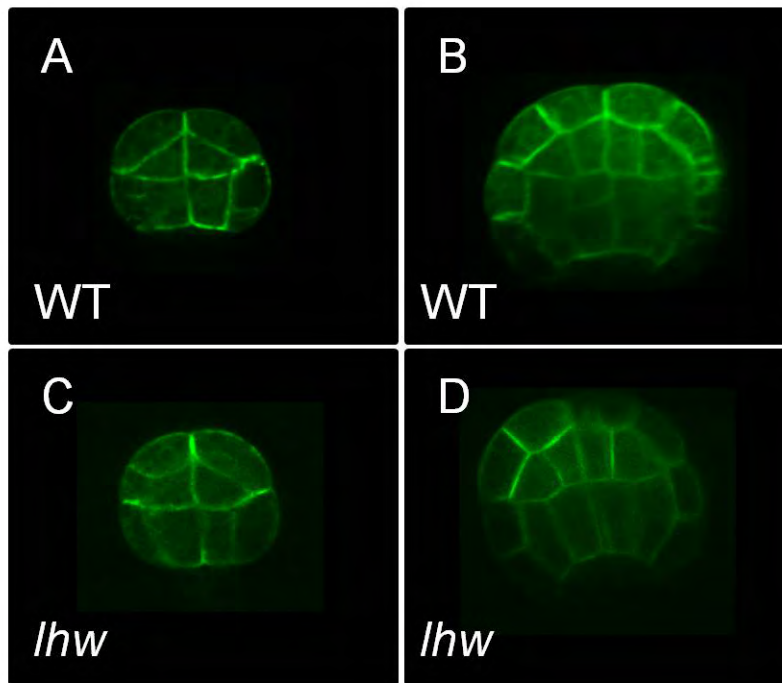

**Fig. S3. Expression patterns of *PIN1::PIN1-GFP* during early embryogenesis. (A,B) Wild-type embryos; (C,D) *lhw* embryos.**

A

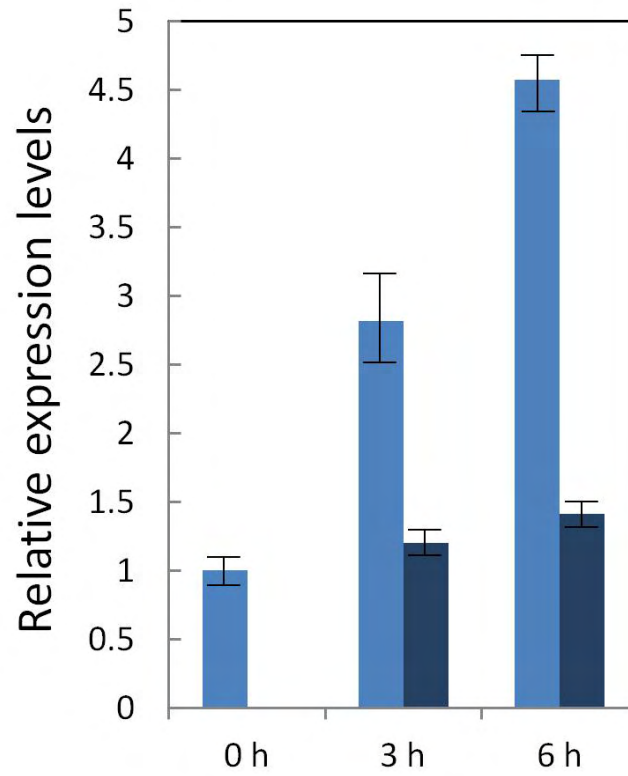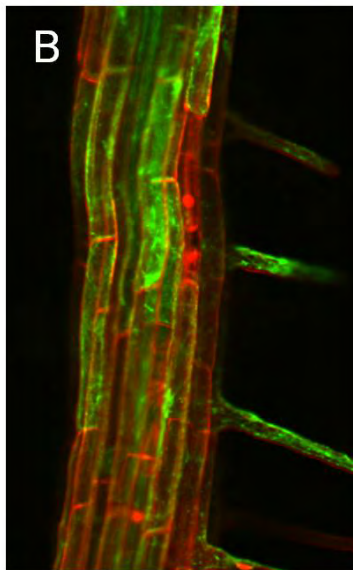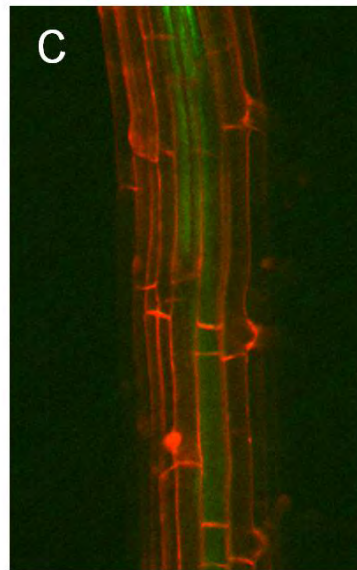

**Fig. S4. Analysis of estrogen-inducible *LHW* plants.** (A) Relative expression levels of *LHW* mRNA 0, 3 and 6 hours after the addition of estrogen (blue) and without estrogen (dark blue). Bars indicate s.d. (B,C) *DR5::GFP* signal in estrogen-inducible *LHW* roots 24 hours after the addition of estrogen (B) or DMSO (C).

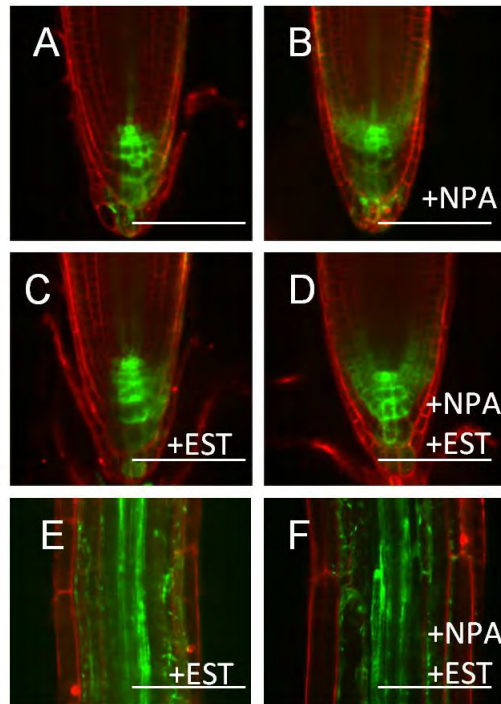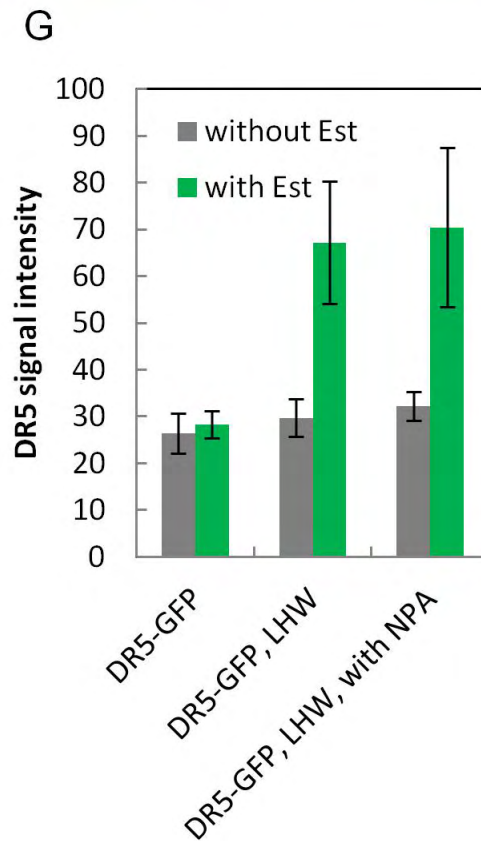

**Fig. S5. Effects of NPA treatment on *DR5::GFP* expression.** (A-F) *DR5::GFP* signal in estrogen-inducible *LHW* roots with or without NPA and estrogen. Images were taken 24 hours after these treatments. (G) *DR5::GFP* signal intensity in estrogen-inducible *LHW* plants with NPA treatment. *DR5::GFP* signal intensity in the differentiation zone of roots was measured at 24 hours after the induction of *LHW* with or without 10  $\mu$ M NPA.

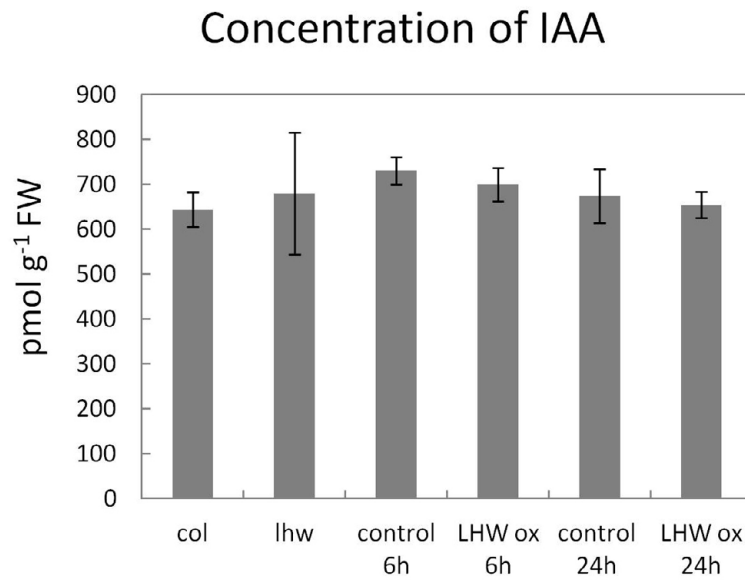

**Fig. S6.** Concentration of IAA in wild-type, *lhw* and *LHW*-overexpressing roots.

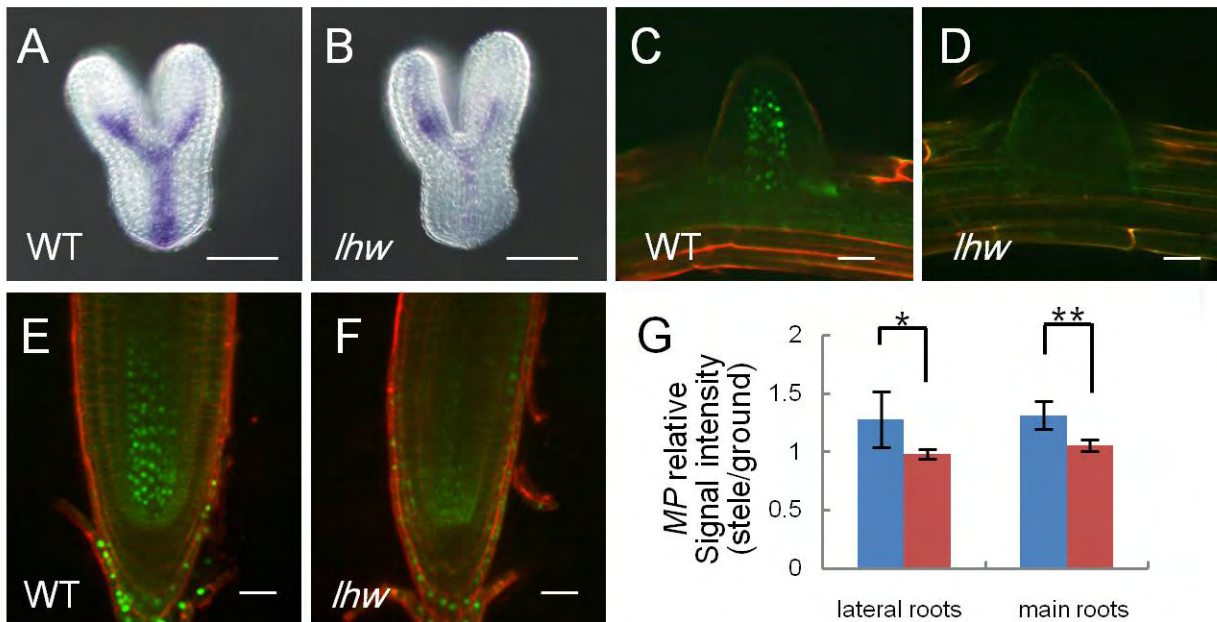

**Fig. S7.** LHW induces *MP* expression in the vascular region. (A,B) Whole-mount *in situ* hybridization using *MP* probe on wild-type (A) and *lhw* (B) embryos. (C,D) *MP::YFP-NLS* expression in lateral root primordia of wild-type (C) and *lhw* (D). (E,F) *MP::YFP-NLS* expression in root apical region of wild-type (E) and *lhw* (F). (G) Relative *MP::YFP-NLS* signal intensity at stele versus ground tissue region in wild-type (blue) and *lhw* (red) roots. Bars indicate s.d.  $n=5$ ,  $*P<0.05$ ,  $**P<0.01$  (*t*-test). Scale bars: 50  $\mu\text{m}$  in A,B; 20  $\mu\text{m}$  in C-F.

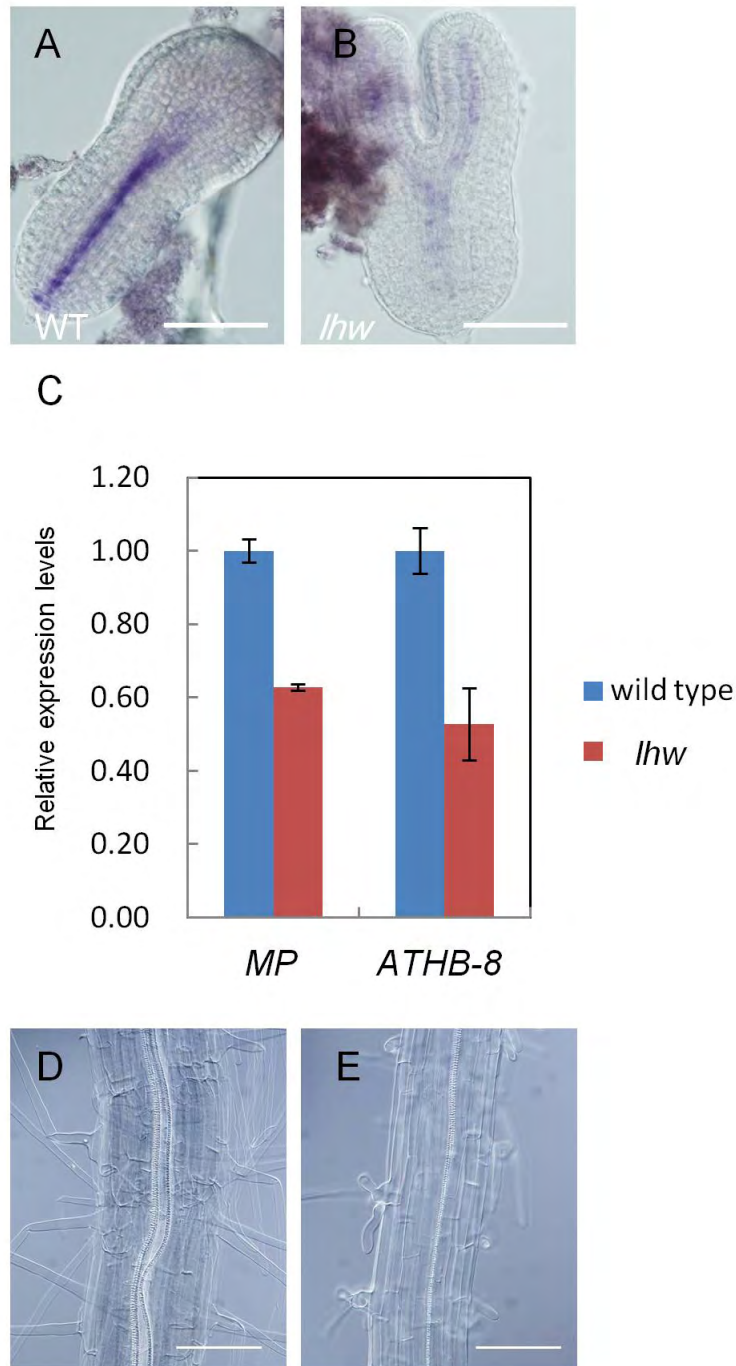

**Fig. S8. Analysis of transcription factors related to auxin signalling.** (A,B) mRNA accumulation patterns of *ATHB-8* in wild-type (A) and *lhw* (B) embryos. Scale bars: 50  $\mu$ m. (C) Quantitative RT-PCR of *MP* and *ATHB-8* transcripts. Total RNA isolated from wild-type and *lhw* roots was used for the analysis. Wild type (blue) and *lhw* (red). (D,E) DIC images of *lhw* roots harbouring *SHR::ATHB-8<sup>r</sup>* (D) and *SHR::PHB<sup>r</sup>* (E). Scale bars: 200  $\mu$ m.

Table S1. The list of primers used for this study

| Purpose                   | Name             | Sequences                                         |
|---------------------------|------------------|---------------------------------------------------|
| RNA probe                 | LHW(1554)-F      | GGAATCCAAGATTATGAAAGAGGACG                        |
| RNA probe                 | LHW-R1           | TTACATTGAACAGCCACCAGTAAC                          |
| RNA probe                 | TMO5(651)-F      | CTTGGTGATAAGAGCATCCTTTTGCT                        |
| RNA probe                 | TMO5-R           | CTAATTATAACATCGATTCACCATC                         |
| RNA probe                 | At1G68810(650)-F | ACATGTGAAAGAGTTGAAGAGA                            |
| RNA probe                 | AT1G68810-R      | TTACCTCTGATTATATTGTTGTTG                          |
| RNA probe                 | MP-F             | CACCATGATGGCTTCATTGTCTTGTG                        |
| RNA probe                 | MP-R             | TTATGAAACAGAAGTCTTAAGATC                          |
| RNA probe                 | ATHB-8-F         | ATGGGAGGAGGAAGCAATAATA                            |
| RNA probe                 | ATHB-8-R         | TCATATAAAAGACCAGTTGAGG                            |
| qRT-PCR                   | LHW-real-F       | AAACCGGGGAATCCAAGA                                |
| qRT-PCR                   | LHW-real-R       | CCTACTTCGAAAGCCCATGT                              |
| qRT-PCR                   | MP-real-F        | TGCCATATGCATCTTCCCTA                              |
| qRT-PCR                   | MP-real-R        | GCCTCATCATCATTTTCATAAGC                           |
| qRT-PCR                   | ATHB-8-real-F    | TGGGGCACTACCAAGAAGAC                              |
| qRT-PCR                   | ATHB-8-real-R    | TGCACATTTGCAGAAGGAAG                              |
| qRT-PCR                   | MBF1A-real-F     | TCGAGACCGTCAGAAAATTCA                             |
| qRT-PCR                   | MBF1A-real-R     | CATTTTTGTGTTTCAGAGATGTGC                          |
| pAtPIN1                   | pPIN1(-1289)-F   | CACCTCATTATATCATCAACCCATTG                        |
|                           | pPIN1(-5)-R      | TGTTCCGCCGAGAAGAGA                                |
| pMP                       | pMP(-2050)-F     | CACCGTATCCGAATAAGTAGTTATGTTTATATAGATATTCTATCATAAT |
|                           | pMP(-1)-R        | CACCACAGAGAGATTTTTCAATGTTCTGTTTTGTCTCT            |
| pSHR                      | pSHR(-2000)-F    | CACCACATAAACCAGTAGACATATGGATAAATATGAACACA         |
|                           | pSHR(-1)-R       | CACCTTTTTTTTTTAAATGAATAAGAAAATGAATAGAAGAAAGGGAGAC |
| ATHB-8orf<br>-mutagenesis | ATHB-8orf-SDM-F  | TGGGTCCAAATGCCTGGGATGAAACCGGGCCTGATTCCATAGGAATCG  |
|                           | ATHB-8orf-SDM-R  | CGATTCCATGGAATCAGGCCCGGTTTCATCCCAGGCATTTGGACCCA   |
| PHBorf<br>-mutagenesis    | PHBorf-SDM-F     | TGGGTTCCAGATGATTGGGATGAAACCGGGCCTGATTCTATTGGCATAG |
|                           | PHBorf-SDM-R     | CTATGCCAATAGAATCAGGCCCGGTTTCATCCCAATCATCTGAACCCA  |
| pENTR-LHW                 | LHW-F            | CACCATGGGAGTTTTACTAAGAGAAGCTT                     |
|                           | LHW-R            | CACCATGGGAGTTTTACTAAGAGAAGCTT                     |



Table S2. Quantification of phytohormones (pmol g<sup>-1</sup> FW)

|                   | col          | lhw           | Control 6h    | LHW <sub>ox</sub> 6h | Control 24h  | LHW <sub>ox</sub> 24h |
|-------------------|--------------|---------------|---------------|----------------------|--------------|-----------------------|
| <b>auxin</b>      |              |               |               |                      |              |                       |
| IAA               | 643.67±39.05 | 680.29±135.9  | 730.56±30.25  | 699.55±37.05         | 673.91±59.75 | 654.13±29.42          |
| IAAla             | 3.041±0.761  | 3.524±0.776   | 3.503±0.329   | 3.107±0.452          | 6.095±0.140  | 4.835±1.740           |
| <b>cytokinin</b>  |              |               |               |                      |              |                       |
| tZ                | 0.549±0.168  | 0.743±0.095   | 0.864±0.093   | 0.691±0.063          | 0.950±0.116  | 1.348±0.302           |
| tZR               | 1.753±0.091  | 4.395±1.006   | 2.273±0.165   | 2.506±0.426          | 3.257±0.538  | 6.015±0.111           |
| tZRP <sub>s</sub> | 6.074±0.194  | 8.056±1.627   | 6.259±0.731   | 7.414±0.934          | 7.752±0.931  | 16.014±1.413          |
| cZ                | 0.703±0.109  | 0.967±0.092   | 1.035±0.146   | 0.615±0.032          | 0.683±0.069  | 0.486±0.065           |
| cZR               | 1.529±0.174  | 1.774±0.186   | 1.726±0.373   | 1.380±0.204          | 1.236±0.205  | 1.432±0.128           |
| cZRP <sub>s</sub> | 4.154±0.435  | 4.335±0.861   | 3.982±0.985   | 3.336±1.166          | 2.296±0.188  | 3.394±0.507           |
| iP                | 1.224±1.530  | 0.442±0.031   | 0.265±0.021   | 0.294±0.019          | 0.262±0.029  | 0.289±0.029           |
| iPR               | 0.160±0.009  | 0.159±0.016   | 0.200±0.028   | 0.201±0.011          | 0.225±0.046  | 0.222±0.002           |
| iPRP <sub>s</sub> | 8.864±0.193  | 10.804±0.340  | 7.245±1.890   | 9.631±1.587          | 8.584±0.788  | 9.940±0.334           |
| tZ7G              | 2.940±0.146  | 3.452±0.237   | 5.905±0.434   | 5.989±0.515          | 6.421±1.367  | 5.525±0.205           |
| tZ9G              | 2.812±0.165  | 3.327±0.108   | 4.698±0.232   | 4.919±0.212          | 5.387±0.751  | 4.659±0.129           |
| tZOG              | 4.076±0.506  | 5.464±0.340   | 5.219±0.411   | 6.197±0.776          | 7.428±1.143  | 6.387±0.503           |
| cZOG              | 2.971±0.181  | 4.501±0.064   | 2.340±0.298   | 2.716±0.201          | 2.628±0.321  | 1.895±0.148           |
| tZROG             | 0.039±0.007  | -             | 0.051±0.023   | 0.040±0.002          | 0.057±0.011  | 0.078±0.021           |
| cZROG             | 0.164±0.048  | 0.264±0.073   | 0.184±0.033   | 0.188±0.022          | 0.193±0.025  | 0.224±0.018           |
| iP7G              | 4.065±0.114  | 5.796±0.124   | 4.474±0.175   | 4.662±0.051          | 4.200±0.181  | 4.102±0.105           |
| iP9G              | 0.905±0.085  | 1.448±0.058   | 0.889±0.058   | 0.894±0.030          | 0.862±0.104  | 0.815±0.082           |
| <b>others</b>     |              |               |               |                      |              |                       |
| GA19              | 0.967±0.152  | 1.397±0.202   | 0.874±0.154   | 0.990±0.186          | 0.739±0.199  | 0.824±0.107           |
| GA20              | 1.433±0.033  | 1.822±0.003   | 1.353±0.091   | 1.339±0.105          | 1.145±0.051  | 1.337±0.147           |
| GA24              | 0.999±0.112  | 0.771±0.031   | -             | 0.910±0.134          | -            | -                     |
| GA53              | 0.841±0.092  | 1.610±0.077   | 1.057±0.068   | 1.124±0.116          | 0.900±0.157  | 0.962±0.277           |
| SA                | 12,355±71.69 | 19,778±2,400  | 29,806±14,511 | 23,794±3,475         | 26,853±6,758 | 23,367±2,692          |
| JA                | 142.52±19.32 | 226.66±28.18  | 126.038±25.87 | 145.57±17.98         | 104.30±6.348 | 119.94±13.60          |
| ABA               | 33.592±3.319 | 63.785±10.175 | 32.009±2.986  | 39.418±1.787         | 27.896±5.100 | 31.421±5.654          |

Concentrations of auxin, cytokinin, gibberellin, SA, JA and ABA in roots. Data are the means±s.d.

(n=3).
